# Supplementary material for: Peripheral monocyte–derived cells counter amyloid plaque pathogenesis in a mouse model of Alzheimer’s disease
Source: JCI journal article supplement (doi:10.1172/jci152565), 2022-05-05
Supplement: sd1 [file 1]

301 Moved Permanently

# Moved Permanently

The document has moved here.
